# Supplementary material
Source: Springer Nature journal article supplement (https://springermedizin.de/resource/supplementary/12885_2009_1776_MOESM4_ESM.pdf/9472908)

**A**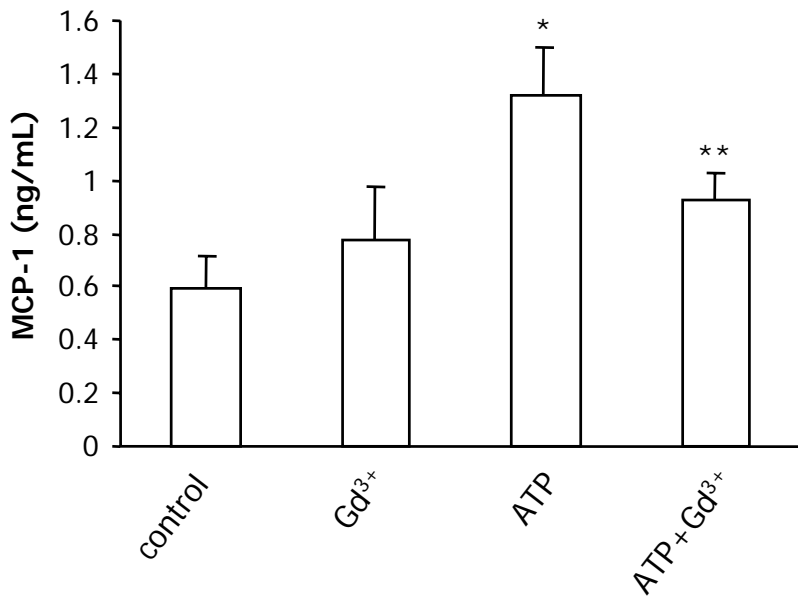**B**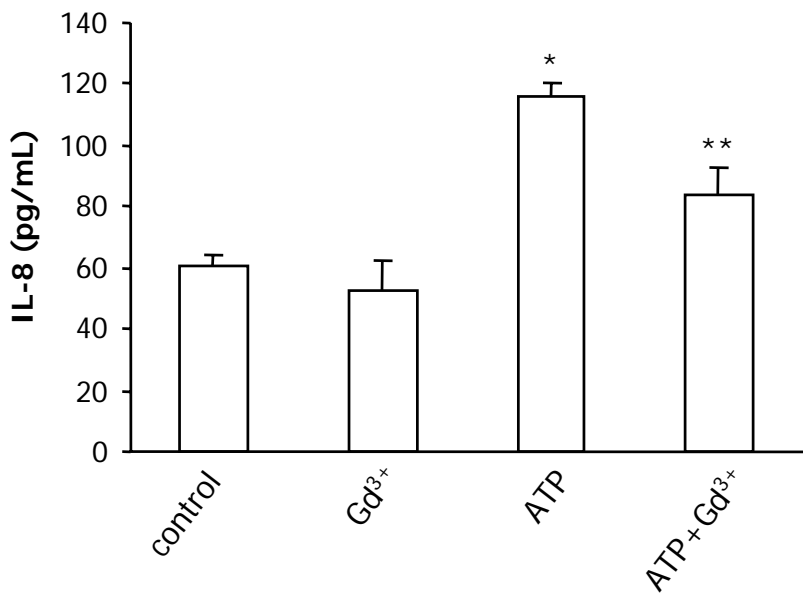

Supplement: MOESM4 [file 9472908]
